# Supplementary material for: SlMYB102 expression enhances low-temperature stress resistance in tomato plants
Source: PeerJ journal article supplement (doi:10.7717/peerj.10059), 2020-10-07
Supplement: Dataset_S1.docx [file Dataset_S1.docx]

These are the data of qRT-PCR.

|  | cq | actin |  | Mean | Standard Deviation |
| --- | --- | --- | --- | --- | --- |
| Leaf | 30.103 | 18.555 | Leaf | 1.000124125 | 0.015716666 |
| 30.088 | 18.777 | stem | 1.029959307 | 0.158896698 |
| 30.142 | 19.186 | root | 7.715110521 | 0.798082054 |
| stem | 28.599 | 16.921 | flower | 4.686310736 | 0.439989196 |
| 28.08 | 17.125 | pistil | 7.538730014 | 0.6426452 |
| 28.437 | 17.333 | stamen | 16.55749573 | 0.645459214 |
| root | 28.298 | 20.391 | GF | 14.16531428 | 1.657536514 |
| 28.662 | 19.776 | RF | 20.16518305 | 3.873890973 |
| 28.495 | 20.293 |  |  |  |
| flower | 24.535 | 15.485 |  |  |  |
| 24.869 | 15.685 |  |  |  |
| 24.675 | 15.76 |  |  |  |
| pistil | 27.608 | 19.052 |  |  |  |
| 27.686 | 19.275 |  |  |  |
| 27.091 | 19.45 |  |  |  |
| stamen | 21.648 | 14.146 |  |  |  |
| 21.754 | 15.1 |  |  |  |
| 21.775 | 14.261 |  |  |  |
| RF | 30.951 | 22.482 |  |  |  |
| 30.911 | 22.442 |  |  |  |
| 31.135 | 22.404 |  |  |  |
| GF | 27.911 | 20.135 |  |  |  |
| 27.919 | 20.581 |  |  |  |
| 27.557 | 20.34 |  |  |  |

|  |  | cq | actin |  |  | cq | actin |
| --- | --- | --- | --- | --- | --- | --- | --- |
| CBF1 | 0WT | 24.262 | 16.44 | CBF3 | 0WT | 29.765 | 17.687 |
| 24.174 | 16.231 | 30.51 | 17.093 |
| 24.283 | 16.694 | 29.372 | 17.401 |
| 3WT | 19.977 | 15.622 | 3WT | 27.133 | 16.639 |
| 20.101 | 15.623 | 27.171 | 17.335 |
| 20.124 | 15.638 | 27.368 | 17.416 |
| 6WT | 20.989 | 16.688 | 6WT | 26.638 | 16.886 |
| 20.979 | 16.663 | 26.935 | 17.195 |
| 20.991 | 16.731 | 26.974 | 16.495 |
| 12WT | 23.907 | 17.858 | 12WT | 29.825 | 17.897 |
| 23.564 | 17.102 | 29.5 | 18.28 |
| 23.518 | 17.708 | 29.666 | 17.837 |
| 0Q4 | 26.814 | 18.99 | 0Q4 | 29.719 | 18.194 |
| 26.187 | 18.696 | 29.498 | 18.688 |
| 26.489 | 18.662 | 29.906 | 18.148 |
| 3Q4 | 21.694 | 17.783 | 3Q4 | 27.447 | 17.076 |
| 21.838 | 17.463 | 26.927 | 17.34 |
| 21.145 | 17.367 | 26.414 | 17.531 |
| 6Q4 | 21.876 | 18.03 | 6Q4 | 27.19 | 18.732 |
| 21.812 | 18.297 | 28.411 | 18.79 |
| 21.853 | 17.916 | 28.025 | 18.75 |
| 12Q4 | 24.51 | 18.177 | 12Q4 | 28.102 | 16.354 |
| 24.53 | 18.446 | 28.478 | 16.208 |
| 24.656 | 18.631 | 28.383 | 16.872 |
| 0Q9 | 24.318 | 17.746 | 0Q9 | 28.344 | 16.109 |
| 24.453 | 17.972 | 28.448 | 16.885 |
| 24.522 | 17.942 | 28.448 | 16.62 |
| 3Q9 | 22.576 | 18.722 | 3Q9 | 27.98 | 18.463 |
| 22.488 | 18.575 | 27.961 | 18.744 |
| 22.617 | 18.906 | 28.882 | 18.283 |
| 6Q9 | 20.529 | 17.396 | 6Q9 | 26.977 | 17.867 |
| 20.711 | 17.17 | 26.94 | 17.807 |
| 20.701 | 16.825 | 26.989 | 17.841 |
| 12Q9 | 24.43 | 18.856 | 12Q9 | 28.332 | 18.556 |
| 24.586 | 19.028 | 28.489 | 18.586 |
| 24.954 | 18.008 | 28.875 | 18.641 |

|  |  | cq | actin |  |  | cq | actin |
| --- | --- | --- | --- | --- | --- | --- | --- |
| ICE1 | 0WT | 25.209 | 18.058 | DREB1 | 0WT | 26.626 | 17.893 |
| 25.196 | 17.727 | 26.406 | 17.839 |
| 25.013 | 17.82 | 26.044 | 17.573 |
| 3WT | 24.412 | 17.901 | 3WT | 25.79 | 17.315 |
| 24.949 | 17.399 | 25.623 | 16.807 |
| 25.061 | 17.427 | 25.49 | 17.188 |
| 6WT | 22.843 | 17.652 | 6WT | 25.648 | 17.497 |
| 22.914 | 17.622 | 25.796 | 17.446 |
| 22.83 | 17.691 | 25.549 | 17.673 |
| 12WT | 25.804 | 18.008 | 12WT | 26.231 | 18.296 |
| 25.773 | 18.044 | 26.921 | 18.196 |
| 25.873 | 18.012 | 26.311 | 18.159 |
| 0Q4 | 24.887 | 17.504 | 0Q4 | 25.817 | 18.173 |
| 24.292 | 17.542 | 25.97 | 18.123 |
| 24.987 | 17.616 | 25.883 | 18.258 |
| 3Q4 | 24.022 | 18.357 | 3Q4 | 26.323 | 18.203 |
| 24.075 | 18.449 | 26.598 | 18.268 |
| 24.064 | 18.22 | 26.575 | 18.281 |
| 6Q4 | 24.355 | 18.464 | 6Q4 | 26.343 | 18.772 |
| 23.924 | 18.96 | 26.771 | 18.965 |
| 23.949 | 18.582 | 26.749 | 18.711 |
| 12Q4 | 24.434 | 17.175 | 12Q4 | 25.004 | 17.644 |
| 24.533 | 17.772 | 25.018 | 17.662 |
| 24.794 | 17.857 | 25.036 | 17.629 |
| 0Q9 | 24.291 | 17.644 | 0Q9 | 25.778 | 17.385 |
| 24.168 | 17.802 | 25.846 | 17.509 |
| 24.185 | 17.76 | 25.921 | 17.075 |
| 3Q9 | 24.164 | 18.233 | 3Q9 | 26.546 | 18.503 |
| 24.833 | 18.373 | 26.858 | 18.584 |
| 24.882 | 18.75 | 26.857 | 18.774 |
| 6Q9 | 22.855 | 17.17 | 6Q9 | 24.697 | 17.543 |
| 22.903 | 17.663 | 24.684 | 17.311 |
| 22.868 | 17.617 | 24.691 | 17.552 |
| 12Q9 | 25.663 | 19.114 | 12Q9 | 26.214 | 19.012 |
| 25.849 | 19.534 | 25.999 | 19.115 |
| 25.678 | 19.636 | 26.034 | 19.297 |

|  |  | cq | actin |  |  | cq | actin |
| --- | --- | --- | --- | --- | --- | --- | --- |
| DREB2 | 0WT | 27.902 | 18.312 | APX2 | 0WT | 26.505 | 18.931 |
| 27.726 | 18.417 | 26.851 | 18.687 |
| 27.37 | 18.007 | 26.186 | 18.426 |
| 3WT | 24.841 | 17.707 | 3WT | 26.183 | 18.287 |
| 25.034 | 17.809 | 26.102 | 18.498 |
| 25.006 | 17.998 | 26.046 | 18.705 |
| 6WT | 24.883 | 18.323 | 6WT | 25.262 | 18.581 |
| 25.085 | 18.338 | 25.271 | 18.441 |
| 25.206 | 18.355 | 25.246 | 18.517 |
| 12WT | 26.14 | 18.945 | 12WT | 26.194 | 18.978 |
| 26.608 | 18.981 | 26.534 | 19.102 |
| 26.096 | 18.863 | 26.089 | 19.01 |
| 0Q4 | 26.118 | 18.343 | 0Q4 | 25.465 | 18.578 |
| 28.036 | 18.072 | 25.154 | 18.563 |
| 26.922 | 17.488 | 25.568 | 18.903 |
| 3Q4 | 24.922 | 18.814 | 3Q4 | 25.624 | 18.966 |
| 24.923 | 19.283 | 25.518 | 19.069 |
| 24.901 | 18.841 | 25.769 | 18.984 |
| 6Q4 | 23.982 | 19.501 | 6Q4 | 25.977 | 19.674 |
| 23.927 | 19.371 | 25.943 | 19.343 |
| 23.947 | 19.285 | 25.988 | 19.516 |
| 12Q4 | 25.483 | 18.416 | 12Q4 | 25.694 | 18.8 |
| 25.454 | 18.467 | 25.686 | 18.927 |
| 25.799 | 18.382 | 25.791 | 18.735 |
| 0Q9 | 27.094 | 18.284 | 0Q9 | 25.723 | 18.656 |
| 27.654 | 18.302 | 25.331 | 18.275 |
| 27.488 | 18.728 | 25.15 | 18.408 |
| 3Q9 | 25.994 | 19.203 | 3Q9 | 26.062 | 19.201 |
| 25.849 | 19.048 | 26.067 | 19.241 |
| 25.913 | 19.394 | 26.077 | 19.245 |
| 6Q9 | 24.166 | 18.719 | 6Q9 | 25.445 | 18.944 |
| 24.259 | 18.355 | 25.894 | 18.348 |
| 24.09 | 18.532 | 25.265 | 18.872 |
| 12Q9 | 25.8 | 19.663 | 12Q9 | 26.582 | 19.931 |
| 25.97 | 19.846 | 26.282 | 19.254 |
| 25.622 | 19.793 | 26.63 | 19.964 |

|  |  | cq | actin |
| --- | --- | --- | --- |
| P5CS | 0WT | 22.619 | 18.548 |
| 22.507 | 18.901 |
| 22.379 | 18.719 |
| 3WT | 22.262 | 18.865 |
| 22.244 | 18.847 |
| 22.299 | 18.833 |
| 6WT | 21.345 | 18.738 |
| 21.472 | 18.422 |
| 21.465 | 18.695 |
| 12WT | 23.343 | 19.52 |
| 23.436 | 19.055 |
| 23.537 | 19.136 |
| 0Q4 | 21.46 | 17.355 |
| 21.277 | 17.961 |
| 21.252 | 17.793 |
| 3Q4 | 21.944 | 18.873 |
| 21.607 | 18.747 |
| 21.982 | 18.806 |
| 6Q4 | 21.674 | 19.086 |
| 21.615 | 19.068 |
| 21.614 | 19.055 |
| 12Q4 | 22.612 | 18.353 |
| 22.698 | 18.276 |
| 22.538 | 18.333 |
| 0Q9 | 20.734 | 18.304 |
| 20.87 | 18.441 |
| 20.58 | 18.453 |
| 3Q9 | 21.74 | 19.04 |
| 21.774 | 19.354 |
| 21.682 | 19.197 |
| 6Q9 | 21.003 | 18.407 |
| 21.083 | 18.492 |
| 21.493 | 18.622 |
| 12Q9 | 23.186 | 19.63 |
| 22.779 | 19.696 |
| 22.85 | 19.587 |
