# Supplementary material for: SlMYB102 expression enhances low-temperature stress resistance in tomato plants
Source: PeerJ journal article supplement (doi:10.7717/peerj.10059), 2020-10-07
Supplement: Full-length_uncropped_blots_of_Figure_4(B).docx [file Full-length_uncropped_blots_of_Figure_4%28B%29.docx]

Figure 4(B) RT-PCR of RT-PCR electropherogram (WT: wild type plants, 1-5: transgenic lines)


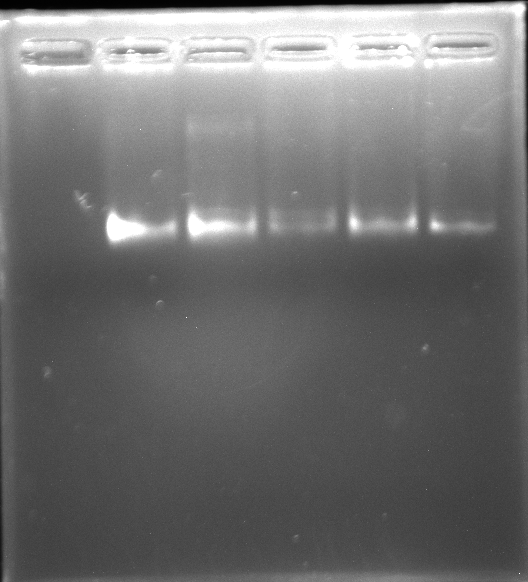

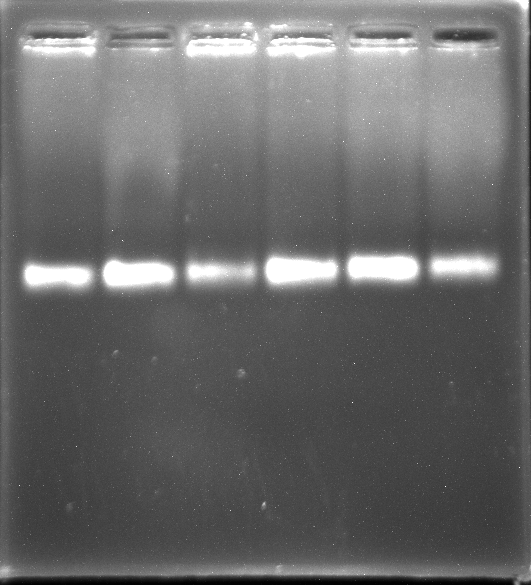


Actin

**WT 1 2 3 4 5**

**WT 1 2 3 4 5**

SIMYB102
