# Supplementary material for: SlMYB102 expression enhances low-temperature stress resistance in tomato plants
Source: PeerJ journal article supplement (doi:10.7717/peerj.10059), 2020-10-07
Supplement: Table_S1.docx [file Table_S1.docx]

Tab.1 Related primer list

| **Primer** | **Sequence** |
| --- | --- |
| SlMYB102 F | CTCATTATCATCAATATGGGTA |
| SlMYB102 R | CATAAATTCATTAGTAGTATCCCAG |
| PBI121 F | ACTATCCTTCGCAAGACCC |
| PBI121 R | CCAGACTGAATGCCCACA |
| NeoR/KanR F | ATTCGGCTATGACTGGGC |
| NeoR/KanR R | GATGTTTCGCTTGGTGGT |
| qRT-PCR F | TGGTCTGCTATTGCTGCACG |
| qRT-PCR R | CGTGGACTGTGTGTCACTGG |
| RT-PCR F | TTGTAGGCTTCGTTGGAC |
| RT-PCR R | AATGGCGTAGGACTTGAT |
| Actin F | TTGCTGACCGTATGAGCAAG |
| Actin R | GGACAATGGATGGACCAGAC |
| SlCBF1 F | CGGCTGAAATGGCGGCTAGAG |
| SlCBF1 R | GGCAGCCTCCAAGCAGAATCAG |
| SlCBF3 F | TCTGCTTGGAGGCTGCCTACTC |
| SlCBF3 R | GAAGATTTCGGCGGCCTGAGC |
| SlICE1 F | TGGTGGTGGTGGTGGTGGTAG |
| SlICE1 R | CCAGAAACAGGCGAGCAGGAAG |
| SlDREB1 F | CTGGTTTCGGCGAGGTATGTCC |
| SlDREB1 R | GCGGTCCCTTCGTCTTTCACTG |
| SlDREB2 F | CCGCCGTAAAAGCCGCTCAC |
| SlDREB2 R | CCGCCGTAAAAGCCGCTCAC |
| SlAPX2 F | GCCTGATGCCACCAAGGGTAAG |
| SlAPX2 R | CGTCCCTCAAGTGGTCACAGC |
| SlP5CS F | CGCTTTGGACTTGGTGCAGAGG |
| SlP5CS R | CTGGGCCACGAGCATGAATACG |
| C-F | CGACATATG GTGGTCTGCTATTGCTGCACGT |
| C-R | TGGGATCCTTACATAAATTCATTAGTAGTA  TCCCAGATATTTGGAATATTATC |
| FL-F | CGACATATG ATGGGTAGAGCTCCTTGTTGTGAAAAAATG |
| FL-R | TGGGATCC TTACATAAATTCATTAGTAGTATCCCAGAT |
| N-F | CGCATATG ATGGGAGAGCTCCTTGTTGTGACA |
| N-R | CTGGATCC TTACTTGTTGCCTAAAATACTGTGGAGTTG |
| Subcellular localization F | GCTCTAGAGCCTCATTATCATCAATATGGGTA |
| Subcellular localization R | TCCCCCGGGTC CATAAATTCATTAGTAGTAT |
