# Supplementary material for: SlMYB102 expression enhances low-temperature stress resistance in tomato plants
Source: PeerJ journal article supplement (doi:10.7717/peerj.10059), 2020-10-07
Supplement: Table_S2.docx [file Table_S2.docx]

Table 2 PCR reaction system

| composition | Dosage |
| --- | --- |
| DNA | 1ul |
| R | 1 μl |
| F | 1 μl |
| PrimeSTAR | 12.5 μl |
| Rnase-free water | up to 25 μl |
