# Supplementary material for: SlMYB102 expression enhances low-temperature stress resistance in tomato plants
Source: PeerJ journal article supplement (doi:10.7717/peerj.10059), 2020-10-07
Supplement: Table_S3.docx [file Table_S3.docx]

Table 3 qRT-PCR Reaction system

| c DNA | 1uL |
| --- | --- |
| Forward Primer | 0.5uL |
| Reverse Primer | 0.5uL |
| TB Green Fast q PCR Mix (2×) | 5uL |
| ddH2O | 3uL |
| Total | 10uL |
